# Supplementary material
Source: PubMed Central journal article supplement (PMC7196007)
Supplement: NIHMS1566826-supplement-Supplemental_Figure_1.pdf [file NIHMS1566826-supplement-Supplemental_Figure_1.pdf]

Supplemental Figure A. 1. Edge weight bootstrap Confidence Interval (CI) values

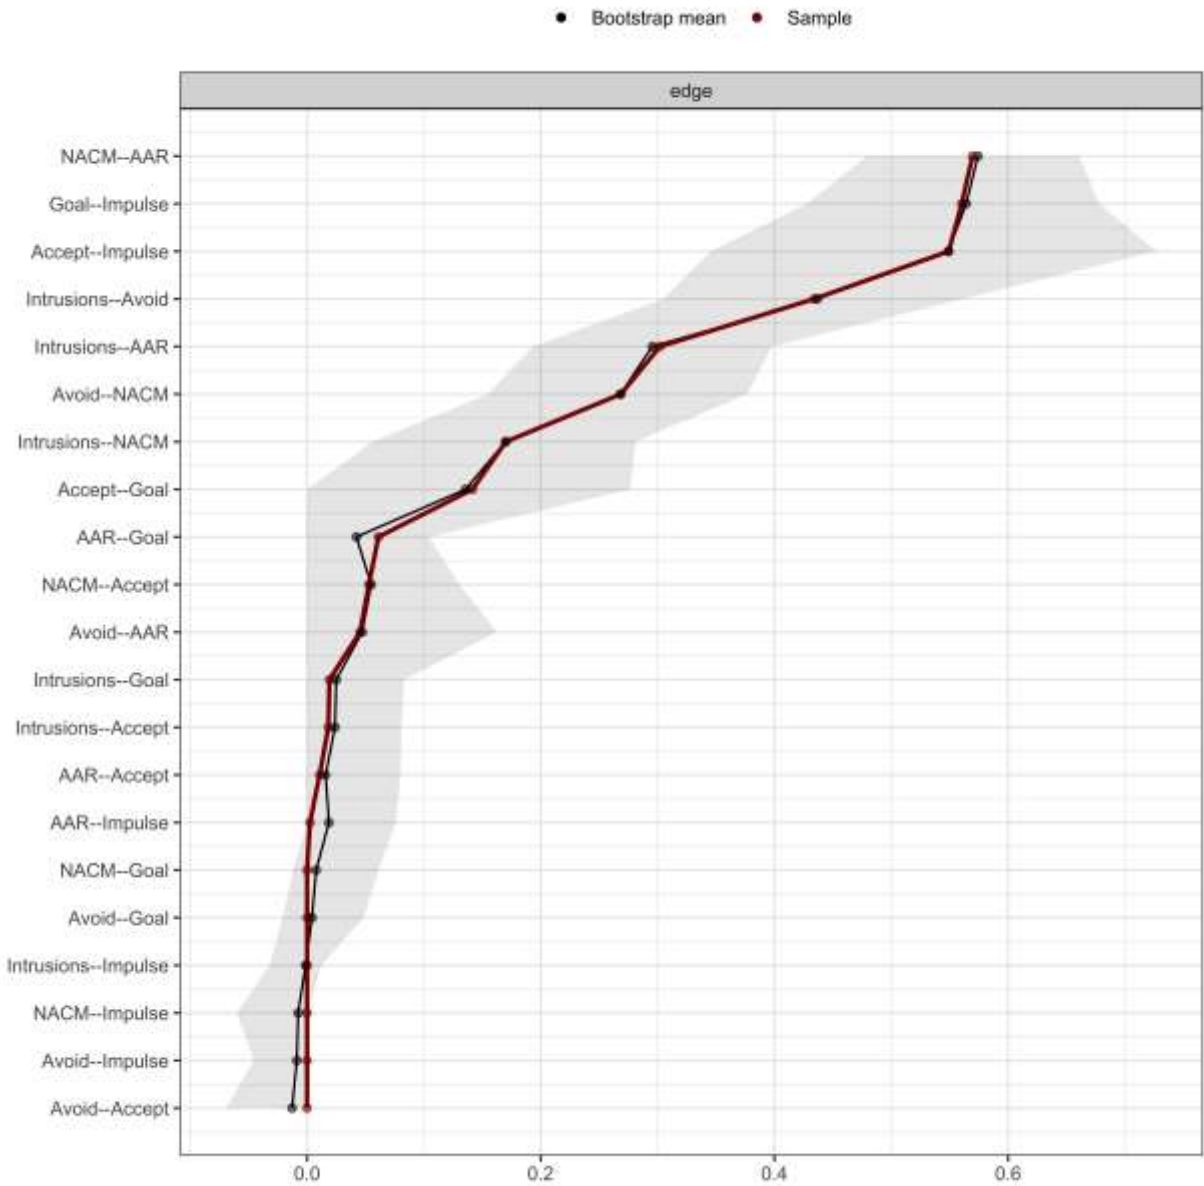

*Note.* NACM = negative alterations in cognitions and mood. AAR = alterations in arousal and reactivity. Accept = nonacceptance of positive emotions. Goals = difficulties engaging in goal-directed behaviors when experiencing positive emotions. Impulse = difficulties controlling impulsive behaviors when experiencing positive emotions.
