# Supplementary material
Source: PubMed Central journal article supplement (PMC7196007)
Supplement: NIHMS1566826-supplement-Supplemental_Figure_2.pdf [file NIHMS1566826-supplement-Supplemental_Figure_2.pdf]

Supplemental Figure A. 2. Tests of significant differences between edge weights

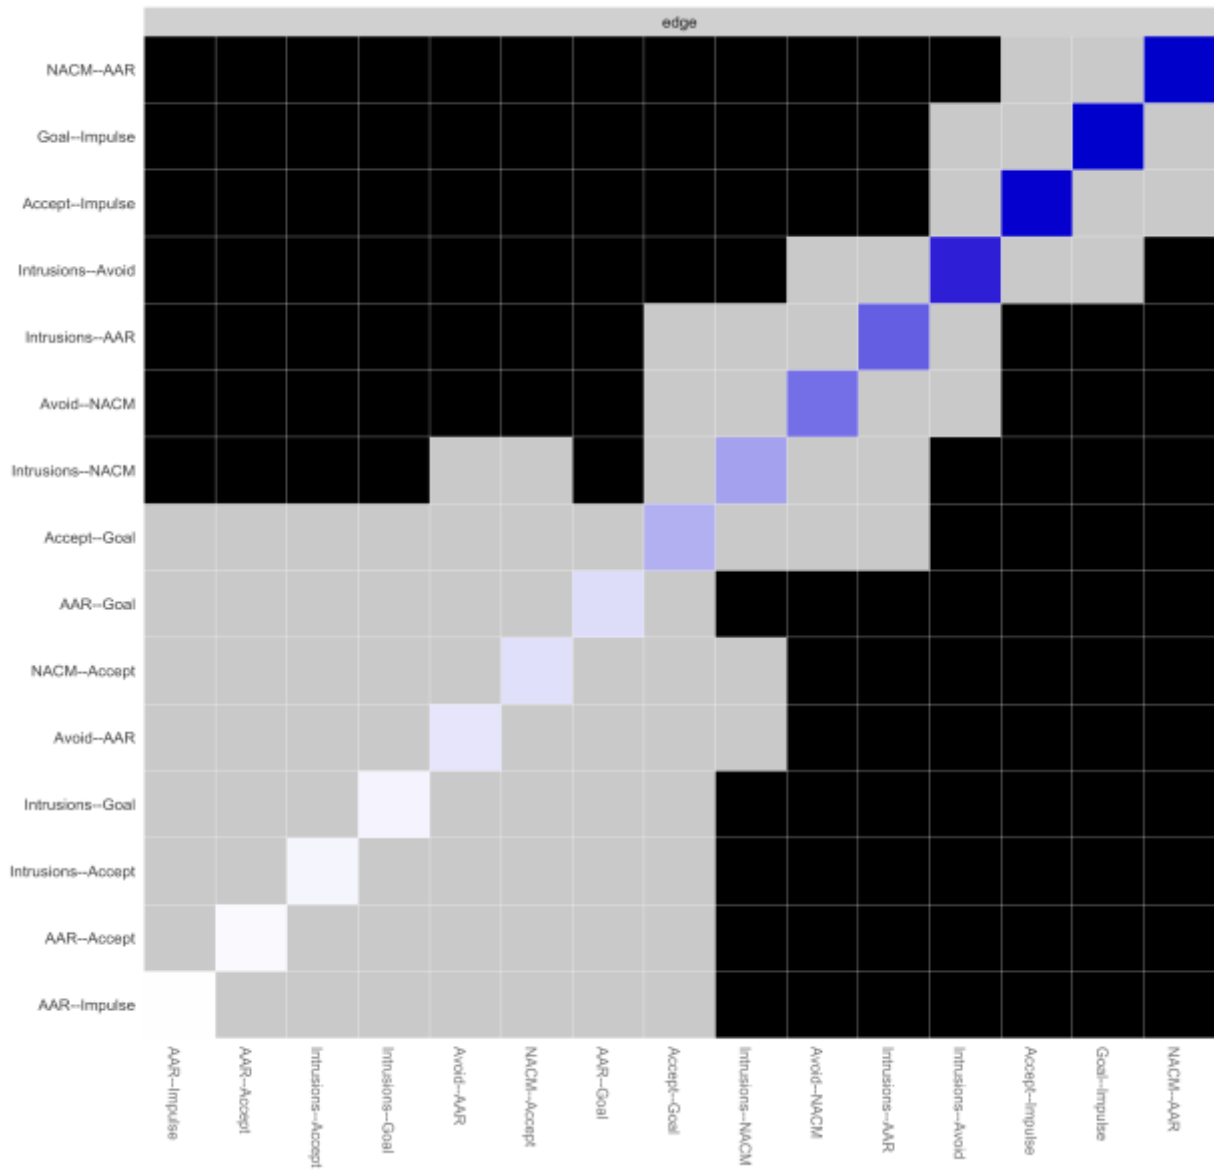

Note. NACM = negative alterations in cognitions and mood. AAR = alterations in arousal and reactivity. Accept = nonacceptance of positive emotions. Goals = difficulties engaging in goal-directed behaviors when experiencing positive emotions. Impulse = difficulties controlling impulsive behaviors when experiencing positive emotions.
